# Supplementary material
Source: PubMed Central journal article supplement (PMC10257676)

## Supplementary Information

**Supplementary Table 1. Vaccine impact (cases averted by vaccination at 5 years of age) at the regional and global levels.** The vaccine impact on cases averted is presented at the regional (United Nations regions) and global levels for different scenarios, based on the lifetime health impact of vaccination administered at 5 years of age for 30 vaccinated cohorts on Strep A disease burden (pharyngitis, impetigo, invasive disease, cellulitis, and rheumatic heart disease).

| UN regions                 | Scenarios | Fully vaccinated individuals (millions) | Cases averted by vaccination at 5 years of age (thousands)<br>(range for scenarios 1-2 and 3-6) |                    |                  |                  |                         |
|----------------------------|-----------|-----------------------------------------|-------------------------------------------------------------------------------------------------|--------------------|------------------|------------------|-------------------------|
|                            |           |                                         | Pharyngitis                                                                                     | Impetigo           | Invasive disease | Cellulitis       | Rheumatic heart disease |
| South Asia                 | 1-2*      | 688                                     | (941,532, 1,214,642)                                                                            | (63,183, 72,453)   | (72, 80)         | (3,921, 4,118)   | (2,077, 2,480)          |
|                            | 3-6       | (398, 405)                              | (544,948, 715,582)                                                                              | (36,569, 42,684)   | (42, 47)         | (2,268, 2,424)   | (1,211, 1,469)          |
| Europe & Central Asia      | 1-2*      | 230                                     | (314,454, 405,725)                                                                              | (21,104, 24,199)   | (24, 27)         | (1,772, 1,934)   | (160, 165)              |
|                            | 3-6       | (124, 126)                              | (169,651, 222,327)                                                                              | (11,386, 13,260)   | (13, 15)         | (981, 1,085)     | (83, 86)                |
| Middle East & North Africa | 1-2*      | 217                                     | (297,569, 383,917)                                                                              | (19,970, 22,899)   | (23, 25)         | (1,160, 1,200)   | (526, 556)              |
|                            | 3-6       | (121, 122)                              | (165,632, 215,138)                                                                              | (11,115, 12,832)   | (13, 14)         | (644, 670)       | (297, 317)              |
| Sub-Saharan Africa         | 1-2*      | 884                                     | (1,206,793, 1,556,228)                                                                          | (80,963, 92,852)   | (92, 102)        | (5,070, 5,256)   | (6,419, 6,501)          |
|                            | 3-6       | (558, 585)                              | (761,012, 1,028,952)                                                                            | (51,052, 61,395)   | (58, 68)         | (3,242, 3,527)   | (4,004, 4,248)          |
| Latin America & Caribbean  | 1-2*      | 191                                     | (262,127, 338,193)                                                                              | (17,591, 20,172)   | (20, 22)         | (3,023, 3,276)   | (710, 728)              |
|                            | 3-6       | (113, 118)                              | (154,736, 208,235)                                                                              | (10,384, 12,420)   | (12, 14)         | (1,782, 2,022)   | (419, 446)              |
| East Asia & Pacific        | 1-2*      | 592                                     | (811,126, 1,046,509)                                                                            | (54,436, 62,420)   | (62, 69)         | (2,549, 2,602)   | (1,154, 1,162)          |
|                            | 3-6       | (327, 340)                              | (447,406, 599,972)                                                                              | (30,026, 35,786)   | (34, 39)         | (1,435, 1,518)   | (626, 654)              |
| North America              | 1-2*      | 108                                     | (148,060, 191,037)                                                                              | (9,937, 11,394)    | (11, 13)         | (4,639, 5,105)   | (2, 3)                  |
|                            | 3-6       | (58, 59)                                | (80,100, 103,928)                                                                               | (5,376, 6,199)     | (6, 7)           | (2,509, 2,777)   | (1, 1)                  |
| Global                     | 1-2*      | 2,911                                   | (3,981,660, 5,136,251)                                                                          | (267,184, 306,388) | (305, 338)       | (22,134, 23,493) | (11,049, 11,594)        |
|                            | 3-6       | (1,699, 1,754)                          | (2,323,484, 3,094,135)                                                                          | (155,909, 184,577) | (178, 204)       | (12,861, 14,022) | (6,641, 7,222)          |

\* Same number of fully vaccinated individuals for scenarios 1 and 2.

**Supplementary Table 2. Vaccine impact (DALYs averted by vaccination at birth) at the regional and global levels.** The vaccine impact on DALYs averted (in thousands) is presented at the regional (United Nations regions) and global levels for different scenarios, based on the lifetime health impact of vaccination administered at birth for 30 vaccinated cohorts on Strep A disease burden (pharyngitis, impetigo, invasive disease, cellulitis, and rheumatic heart disease).

| UN regions                 | Scenarios | Fully vaccinated individuals (millions) | DALYs averted by vaccination at birth (thousands)<br>(range for scenarios 1-2 and 3-6) |          |                  |            |                         |
|----------------------------|-----------|-----------------------------------------|----------------------------------------------------------------------------------------|----------|------------------|------------|-------------------------|
|                            |           |                                         | Pharyngitis                                                                            | Impetigo | Invasive disease | Cellulitis | Rheumatic heart disease |
| South Asia                 | 1-2*      | 657                                     | (206, 216)                                                                             | (19, 21) | (1,321, 1,400)   | (9, 9)     | (24,398, 32,854)        |
|                            | 3-6       | (381, 388)                              | (119, 127)                                                                             | (11, 12) | (764, 820)       | (5, 5)     | (14,229, 19,354)        |
| Europe & Central Asia      | 1-2*      | 226                                     | (71, 75)                                                                               | (7, 7)   | (495, 525)       | (5, 5)     | (2,387, 2,720)          |
|                            | 3-6       | (122, 124)                              | (38, 41)                                                                               | (4, 4)   | (267, 284)       | (3, 3)     | (1,233, 1,413)          |
| Middle East & North Africa | 1-2*      | 218                                     | (68, 72)                                                                               | (6, 7)   | (458, 485)       | (3, 3)     | (8,394, 9,507)          |
|                            | 3-6       | (121, 122)                              | (38, 40)                                                                               | (4, 4)   | (251, 271)       | (2, 2)     | (4,678, 5,410)          |
| Sub-Saharan Africa         | 1-2*      | 918                                     | (285, 298)                                                                             | (27, 29) | (1,710, 1,813)   | (13, 13)   | (79,908, 98,237)        |
|                            | 3-6       | (583, 607)                              | (180, 197)                                                                             | (17, 19) | (1,068, 1,191)   | (8, 9)     | (49,637, 63,933)        |
| Latin America & Caribbean  | 1-2*      | 184                                     | (58, 61)                                                                               | (5, 6)   | (398, 422)       | (8, 9)     | (10,341, 12,141)        |
|                            | 3-6       | (109, 113)                              | (34, 37)                                                                               | (3, 4)   | (235, 256)       | (5, 6)     | (6,095, 7,338)          |
| East Asia & Pacific        | 1-2*      | 575                                     | (181, 190)                                                                             | (17, 18) | (1,240, 1,314)   | (7, 8)     | (19,143, 21,000)        |
|                            | 3-6       | (317, 329)                              | (100, 108)                                                                             | (9, 10)  | (682, 739)       | (4, 4)     | (10,356, 11,603)        |
| North America              | 1-2*      | 107                                     | (34, 35)                                                                               | (3, 3)   | (239, 253)       | (9, 10)    | (22, 22)                |
|                            | 3-6       | (58, 58)                                | (18, 19)                                                                               | (2, 2)   | (128, 138)       | (5, 6)     | (12, 12)                |
| Global                     | 1-2*      | 2,886                                   | (902, 946)                                                                             | (85, 90) | (5,862, 6,212)   | (54, 57)   | (144,593, 176,481)      |
|                            | 3-6       | (1,690, 1,741)                          | (527, 570)                                                                             | (50, 54) | (3,396, 3,699)   | (32, 34)   | (86,241, 109,064)       |

\*Same number of fully vaccinated individuals for scenarios 1 and 2.

**Supplementary Table 3. Vaccine impact (DALYs averted by vaccination at 5 years of age) at the regional and global levels.** The vaccine impact on DALYs averted (in thousands) is presented at the regional (United Nations regions) and global levels for different scenarios, based on the lifetime health impact of vaccination administered at 5 years of age for 30 vaccinated cohorts on Strep A disease burden (pharyngitis, impetigo, invasive disease, cellulitis, and rheumatic heart disease).

| UN regions                 | Scenarios | Fully vaccinated individuals (millions) | DALYs averted by vaccination at 5 years of age (thousands) (range for scenarios 1-2 and 3-6) |          |                  |            |                         |
|----------------------------|-----------|-----------------------------------------|----------------------------------------------------------------------------------------------|----------|------------------|------------|-------------------------|
|                            |           |                                         | Pharyngitis                                                                                  | Impetigo | Invasive disease | Cellulitis | Rheumatic heart disease |
| South Asia                 | 1-2*      | 688                                     | (335, 432)                                                                                   | (16, 18) | (366, 403)       | (9, 9)     | (45,824, 52,767)        |
|                            | 3-6       | (398, 405)                              | (194, 255)                                                                                   | (9, 11)  | (212, 236)       | (5, 6)     | (26,687, 31,032)        |
| Europe & Central Asia      | 1-2*      | 230                                     | (112, 144)                                                                                   | (5, 6)   | (134, 148)       | (4, 4)     | (3,563, 3,570)          |
|                            | 3-6       | (124, 126)                              | (60, 79)                                                                                     | (3, 3)   | (72, 80)         | (2, 2)     | (1,842, 1,853)          |
| Middle East & North Africa | 1-2*      | 217                                     | (106, 137)                                                                                   | (5, 6)   | (121, 134)       | (3, 3)     | (12,008, 12,368)        |
|                            | 3-6       | (121, 122)                              | (59, 77)                                                                                     | (3, 3)   | (67, 75)         | (1, 2)     | (6,702, 7,049)          |
| Sub-Saharan Africa         | 1-2*      | 884                                     | (430, 554)                                                                                   | (21, 24) | (438, 481)       | (12, 12)   | (131,948, 133,244)      |
|                            | 3-6       | (558, 585)                              | (271, 366)                                                                                   | (13, 16) | (273, 317)       | (7, 8)     | (81,343, 86,674)        |
| Latin America & Caribbean  | 1-2*      | 191                                     | (93, 120)                                                                                    | (4, 5)   | (110, 122)       | (7, 8)     | (16,831, 16,905)        |
|                            | 3-6       | (113, 118)                              | (55, 74)                                                                                     | (3, 3)   | (65, 74)         | (4, 5)     | (9,929, 10,252)         |
| East Asia & Pacific        | 1-2*      | 592                                     | (289, 372)                                                                                   | (14, 16) | (339, 375)       | (6, 6)     | (27,130, 27,490)        |
|                            | 3-6       | (327, 340)                              | (159, 214)                                                                                   | (8, 9)   | (186, 211)       | (3, 3)     | (14,657, 15,220)        |
| North America              | 1-2*      | 108                                     | (53, 68)                                                                                     | (3, 3)   | (64, 71)         | (11, 12)   | (13, 15)                |
|                            | 3-6       | (58, 59)                                | (29, 37)                                                                                     | (1, 2)   | (34, 39)         | (6, 6)     | (7, 8)                  |
| Global                     | 1-2*      | 2,911                                   | (1,417, 1,828)                                                                               | (68, 78) | (1,573, 1,733)   | (51, 54)   | (237,317, 246,359)      |
|                            | 3-6       | (1,699, 1,754)                          | (827, 1,101)                                                                                 | (40, 47) | (909, 1,030)     | (29, 32)   | (141,167, 152,088)      |

\* Same number of fully vaccinated individuals for scenarios 1 and 2.

**Supplementary Table 4. Vaccine impact (deaths averted by vaccination at 5 years of age) at the regional and global levels.** The vaccine impact on deaths averted (in thousands) is presented at the regional (United Nations regions) and global levels for different scenarios, based on the lifetime health impact of vaccination administered at 5 years of age for 30 vaccinated cohorts on Strep A disease burden (invasive disease and rheumatic heart disease).

| UN regions                 | Scenarios | Fully vaccinated individuals (millions) | Deaths averted by vaccination at 5 years of age (thousands)<br>(range for scenarios 1-2 and 3-6) |                         |
|----------------------------|-----------|-----------------------------------------|--------------------------------------------------------------------------------------------------|-------------------------|
|                            |           |                                         | Invasive disease                                                                                 | Rheumatic heart disease |
| South Asia                 | 1-2*      | 688                                     | (5, 6)                                                                                           | (624, 745)              |
|                            | 3-6       | (398, 405)                              | (3, 4)                                                                                           | (364, 441)              |
| Europe & Central Asia      | 1-2*      | 230                                     | (2, 2)                                                                                           | (48, 49)                |
|                            | 3-6       | (124, 126)                              | (1, 1)                                                                                           | (25, 25)                |
| Middle East & North Africa | 1-2*      | 217                                     | (2, 2)                                                                                           | (156, 165)              |
|                            | 3-6       | (121, 122)                              | (1, 1)                                                                                           | (88, 94)                |
| Sub-Saharan Africa         | 1-2*      | 884                                     | (7, 8)                                                                                           | (1,928, 1,953)          |
|                            | 3-6       | (558, 585)                              | (4, 5)                                                                                           | (1,203, 1,276)          |
| Latin America & Caribbean  | 1-2*      | 191                                     | (1, 2)                                                                                           | (210, 216)              |
|                            | 3-6       | (113, 118)                              | (1, 1)                                                                                           | (124, 132)              |
| East Asia & Pacific        | 1-2*      | 592                                     | (5, 5)                                                                                           | (346, 349)              |
|                            | 3-6       | (327, 340)                              | (3, 3)                                                                                           | (188, 196)              |
| North America              | 1-2*      | 108                                     | (1, 1)                                                                                           | (0.07, 0.08)            |
|                            | 3-6       | (58, 59)                                | (0.45, 0.52)                                                                                     | (0.04, 0.04)            |
| Global                     | 1-2*      | 2,911                                   | (23, 26)                                                                                         | (3,313, 3,476)          |
|                            | 3-6       | (1,699, 1,754)                          | (13, 15)                                                                                         | (1,992, 2,166)          |

\* Same number of fully vaccinated individuals for scenarios 1 and 2.

**Supplementary Table 5. Country-specific coverage and year of introduction for Strep A vaccination.**

| <b>Country</b>           | <b>Vaccine coverage (%)</b> | <b>Vaccine introduction (year)</b> |
|--------------------------|-----------------------------|------------------------------------|
| Afghanistan              | 66                          | 2030                               |
| Albania                  | 99                          | 2025                               |
| Algeria                  | 91                          | 2026                               |
| Angola                   | 59                          | 2027                               |
| Antigua and Barbuda      | 95                          | 2027                               |
| Argentina                | 86                          | 2027                               |
| Armenia                  | 92                          | 2022                               |
| Australia                | 94                          | 2025                               |
| Austria                  | 85                          | 2030                               |
| Azerbaijan               | 95                          | 2026                               |
| Bahamas, The             | 90                          | 2027                               |
| Bahrain                  | 99                          | 2027                               |
| Bangladesh               | 98                          | 2025                               |
| Barbados                 | 95                          | 2026                               |
| Belarus                  | 9                           | 2030                               |
| Belgium                  | 97                          | 2027                               |
| Belize                   | 96                          | 2028                               |
| Benin                    | 76                          | 2026                               |
| Bhutan                   | 97                          | 2028                               |
| Bolivia                  | 83                          | 2027                               |
| Bosnia and Herzegovina   | 62                          | 2032                               |
| Botswana                 | 95                          | 2022                               |
| Brazil                   | 83                          | 2027                               |
| Brunei Darussalam        | 99                          | 2030                               |
| Bulgaria                 | 92                          | 2027                               |
| Burkina Faso             | 91                          | 2022                               |
| Burundi                  | 90                          | 2022                               |
| Cabo Verde               | 99                          | 2025                               |
| Cambodia                 | 92                          | 2026                               |
| Cameroon                 | 79                          | 2027                               |
| Canada                   | 91                          | 2025                               |
| Central African Republic | 47                          | 2028                               |
| Chad                     | 41                          | 2030                               |

|                          |    |      |
|--------------------------|----|------|
| Chile                    | 95 | 2029 |
| China                    | 99 | 2028 |
| Colombia                 | 92 | 2027 |
| Comoros                  | 91 | 2025 |
| Congo, Dem. Rep.         | 81 | 2028 |
| Congo, Rep.              | 75 | 2025 |
| Costa Rica               | 94 | 2025 |
| Côte d'Ivoire            | 82 | 2025 |
| Croatia                  | 94 | 2030 |
| Cuba                     | 99 | 2028 |
| Cyprus                   | 97 | 2029 |
| Czech Republic / Czechia | 94 | 2030 |
| Denmark                  | 97 | 2029 |
| Djibouti                 | 84 | 2025 |
| Dominican Republic       | 90 | 2027 |
| Ecuador                  | 85 | 2027 |
| Egypt, Arab Rep.         | 95 | 2028 |
| El Salvador              | 81 | 2027 |
| Equatorial Guinea        | 25 | 2030 |
| Eritrea                  | 95 | 2022 |
| Estonia                  | 92 | 2027 |
| Eswatini                 | 90 | 2022 |
| Ethiopia                 | 72 | 2027 |
| Fiji                     | 99 | 2022 |
| Finland                  | 91 | 2027 |
| France                   | 95 | 2029 |
| Gabon                    | 70 | 2028 |
| Gambia, The              | 93 | 2025 |
| Georgia                  | 93 | 2025 |
| Germany                  | 92 | 2027 |
| Ghana                    | 97 | 2022 |
| Greece                   | 99 | 2027 |
| Grenada                  | 96 | 2028 |
| Guatemala                | 86 | 2027 |
| Guinea                   | 45 | 2030 |
| Guinea-Bissau            | 88 | 2025 |

|                           |    |      |
|---------------------------|----|------|
| Guyana                    | 95 | 2025 |
| Haiti                     | 64 | 2028 |
| Honduras                  | 90 | 2027 |
| Hungary                   | 99 | 2029 |
| Iceland                   | 91 | 2029 |
| India                     | 89 | 2025 |
| Indonesia                 | 79 | 2032 |
| Iran, Islamic Rep.        | 99 | 2027 |
| Iraq                      | 84 | 2027 |
| Ireland                   | 94 | 2027 |
| Israel                    | 98 | 2027 |
| Italy                     | 94 | 2027 |
| Jamaica                   | 98 | 2027 |
| Japan                     | 99 | 2029 |
| Jordan                    | 96 | 2031 |
| Kazakhstan                | 98 | 2029 |
| Kenya                     | 92 | 2022 |
| Kiribati                  | 95 | 2022 |
| Korea, Dem. People's Rep. | 97 | 2028 |
| Korea, Rep.               | 98 | 2028 |
| Kuwait                    | 99 | 2027 |
| Kyrgyz Republic           | 92 | 2025 |
| Lao PDR                   | 68 | 2028 |
| Latvia                    | 96 | 2027 |
| Lebanon                   | 85 | 2031 |
| Lesotho                   | 93 | 2025 |
| Liberia                   | 84 | 2025 |
| Libya                     | 97 | 2027 |
| Lithuania                 | 92 | 2027 |
| Luxembourg                | 99 | 2027 |
| Madagascar                | 75 | 2025 |
| Malawi                    | 92 | 2022 |
| Malaysia                  | 99 | 2028 |
| Maldives                  | 99 | 2028 |
| Mali                      | 71 | 2025 |
| Malta                     | 97 | 2030 |

|                       |    |      |
|-----------------------|----|------|
| Mauritania            | 81 | 2025 |
| Mauritius             | 97 | 2025 |
| Mexico                | 88 | 2030 |
| Micronesia, Fed. Sts. | 59 | 2025 |
| Moldova               | 92 | 2027 |
| Mongolia              | 99 | 2026 |
| Montenegro            | 87 | 2033 |
| Morocco               | 99 | 2025 |
| Mozambique            | 80 | 2025 |
| Myanmar               | 91 | 2026 |
| Namibia               | 89 | 2025 |
| Nepal                 | 91 | 2026 |
| Netherlands           | 93 | 2029 |
| New Zealand           | 92 | 2025 |
| Nicaragua             | 98 | 2025 |
| Niger                 | 89 | 2025 |
| Nigeria               | 57 | 2028 |
| North Macedonia       | 91 | 2030 |
| Norway                | 96 | 2027 |
| Oman                  | 99 | 2029 |
| Pakistan              | 75 | 2027 |
| Panama                | 88 | 2027 |
| Papua New Guinea      | 61 | 2027 |
| Paraguay              | 88 | 2027 |
| Peru                  | 84 | 2027 |
| Philippines           | 65 | 2032 |
| Poland                | 95 | 2029 |
| Portugal              | 99 | 2029 |
| Qatar                 | 98 | 2027 |
| Romania               | 86 | 2032 |
| Russian Federation    | 97 | 2030 |
| Rwanda                | 97 | 2022 |
| Samoa                 | 34 | 2030 |
| São Tomé and Príncipe | 95 | 2022 |
| Saudi Arabia          | 96 | 2027 |
| Senegal               | 82 | 2022 |



|                                |    |      |
|--------------------------------|----|------|
| Serbia                         | 96 | 2029 |
| Seychelles                     | 99 | 2025 |
| Sierra Leone                   | 90 | 2022 |
| Singapore                      | 96 | 2029 |
| Slovak Republic / Slovakia     | 96 | 2029 |
| Slovenia                       | 93 | 2029 |
| Solomon Islands                | 85 | 2024 |
| Somalia                        | 42 | 2030 |
| South Africa                   | 74 | 2024 |
| South Sudan                    | 49 | 2030 |
| Spain                          | 94 | 2029 |
| Sri Lanka                      | 99 | 2030 |
| St. Lucia                      | 95 | 2027 |
| St. Vincent and the Grenadines | 97 | 2028 |
| Sudan                          | 93 | 2025 |
| Suriname                       | 95 | 2030 |
| Sweden                         | 97 | 2029 |
| Switzerland                    | 95 | 2029 |
| Syrian Arab Republic           | 48 | 2033 |
| Tajikistan                     | 96 | 2026 |
| Tanzania                       | 98 | 2025 |
| Thailand                       | 97 | 2030 |
| Timor-Leste                    | 83 | 2030 |
| Togo                           | 88 | 2025 |
| Tonga                          | 81 | 2024 |
| Trinidad and Tobago            | 99 | 2026 |
| Tunisia                        | 97 | 2030 |
| Turkey                         | 98 | 2029 |
| Turkmenistan                   | 99 | 2026 |
| Uganda                         | 93 | 2022 |
| Ukraine                        | 39 | 2033 |
| United Arab Emirates           | 99 | 2025 |
| United Kingdom                 | 94 | 2026 |
| United States                  | 92 | 2027 |
| Uruguay                        | 91 | 2029 |
| Uzbekistan                     | 98 | 2025 |

|               |    |      |
|---------------|----|------|
| Vanuatu       | 85 | 2025 |
| Venezuela, RB | 60 | 2034 |
| Vietnam       | 75 | 2033 |
| Yemen, Rep.   | 65 | 2027 |
| Zambia        | 90 | 2025 |
| Zimbabwe      | 89 | 2022 |

**Supplementary Figure 1. Vaccine impact (DALYs averted) at the country-income level.** The vaccine impact on DALYs averted (in thousands) is stratified by income levels of countries (World Bank income classification), based on the lifetime health impact of vaccination at birth or 5 years of age for 30 vaccinated cohorts on Strep A disease burden (pharyngitis, impetigo, invasive disease, cellulitis, and rheumatic heart disease). The vertical bars show the estimates for scenario 1, and the error bars show the range across scenarios 1-6. Note the differences in scale between the left panel (pharyngitis, impetigo and cellulitis) and the right panel (invasive and rheumatic heart disease).

**Vaccination at birth**

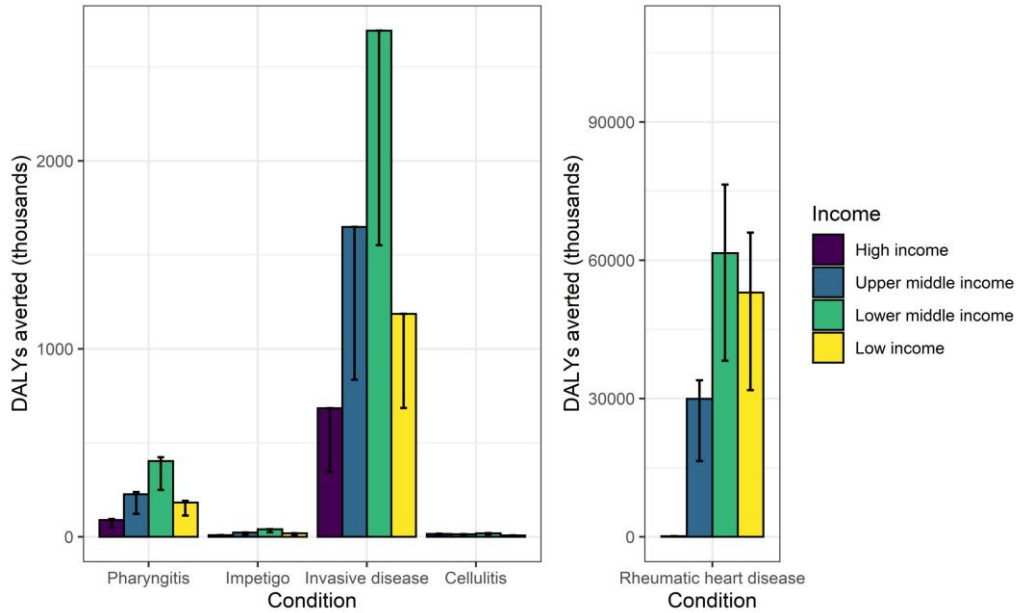

**Vaccination at 5 years of age**

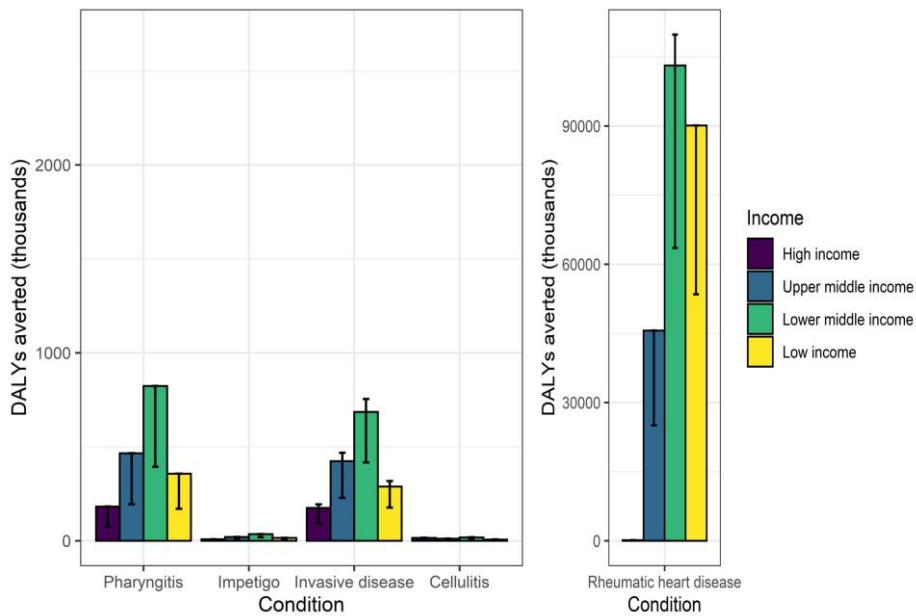

**Supplementary Figure 2. Vaccine impact (deaths averted) at the country-income level.** The vaccine impact on deaths averted (in thousands) is stratified by income levels of countries (World Bank income classification), based on the lifetime health impact of vaccination at birth or 5 years of age for 30 vaccinated cohorts on Strep A disease burden (invasive disease and rheumatic heart disease). The vertical bars show the estimates for scenario 1, and the error bars show the range across scenarios 1-6. Note the differences in scale between the left panel (invasive disease) and the right panel (rheumatic heart disease). For rheumatic heart disease in high-income countries, the range of values for age 0 is (0.3, 0.6) and for age 5 (0.4, 0.7).

**Vaccination at birth**

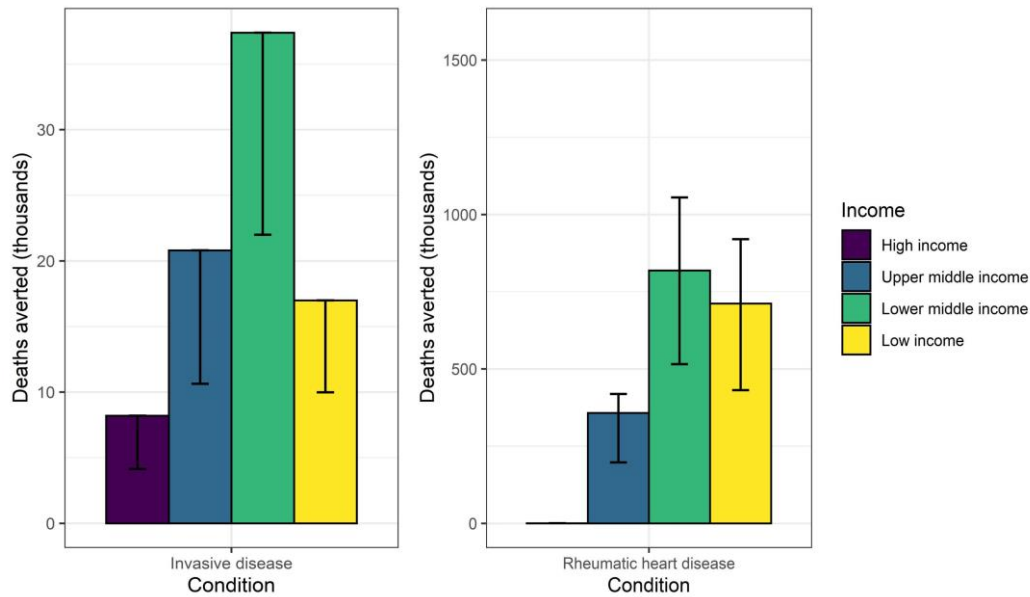

**Vaccination at 5 years of age**

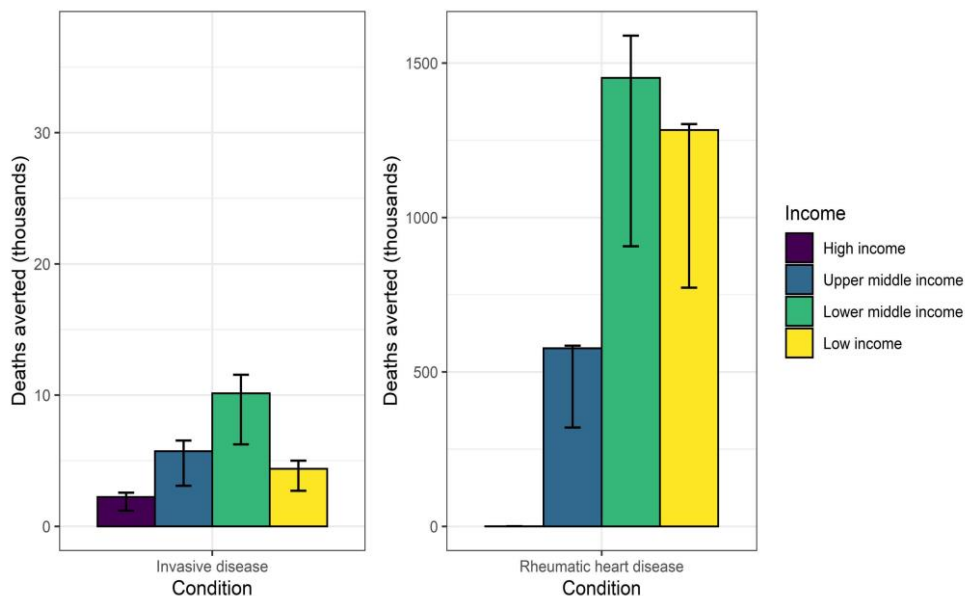

**Supplementary Figure 3. Vaccine impact (DALYs averted per 1,000 fully vaccinated individuals) at the regional and global levels.** The vaccine impact on DALYs averted per 1,000 fully vaccinated individuals is stratified at the regional (United Nations regions) and global levels for different scenarios (estimate for scenario 1 and range across the six scenarios), based on the lifetime health impact of vaccination at birth or 5 years of age for 30 vaccinated cohorts on Strep A disease burden (pharyngitis, impetigo, invasive disease, cellulitis, and rheumatic heart disease). The vertical bars show the estimates for scenarios 1, 3, and 5 (which are equal), and the error bars show the estimates for scenarios 2, 4, and 6 (which are equal).

**Vaccination at birth**

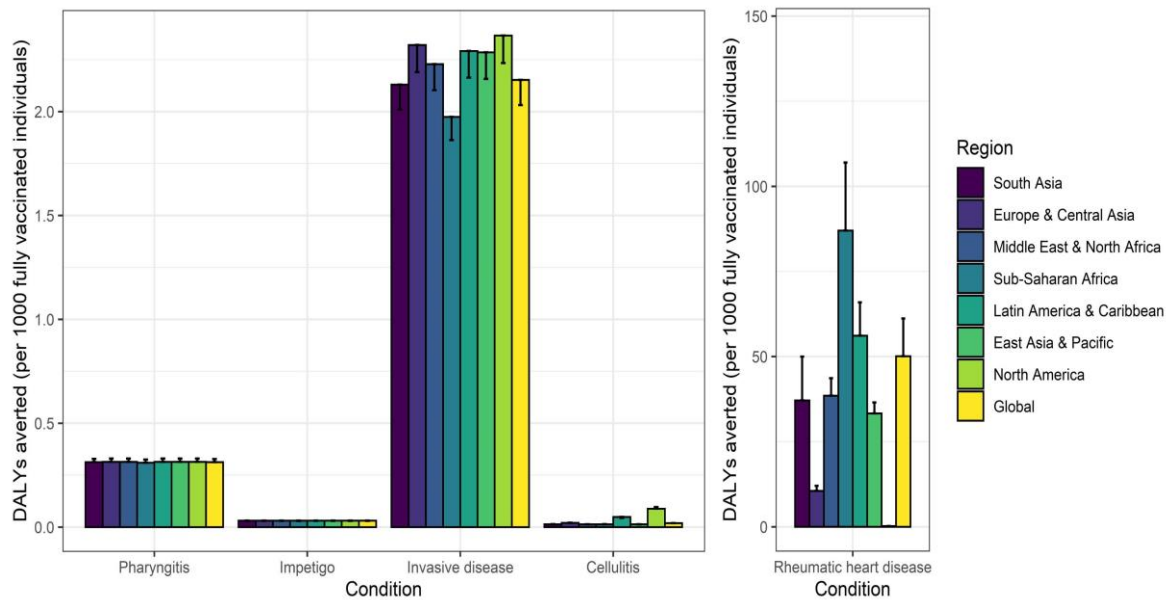

**Vaccination at 5 years of age**

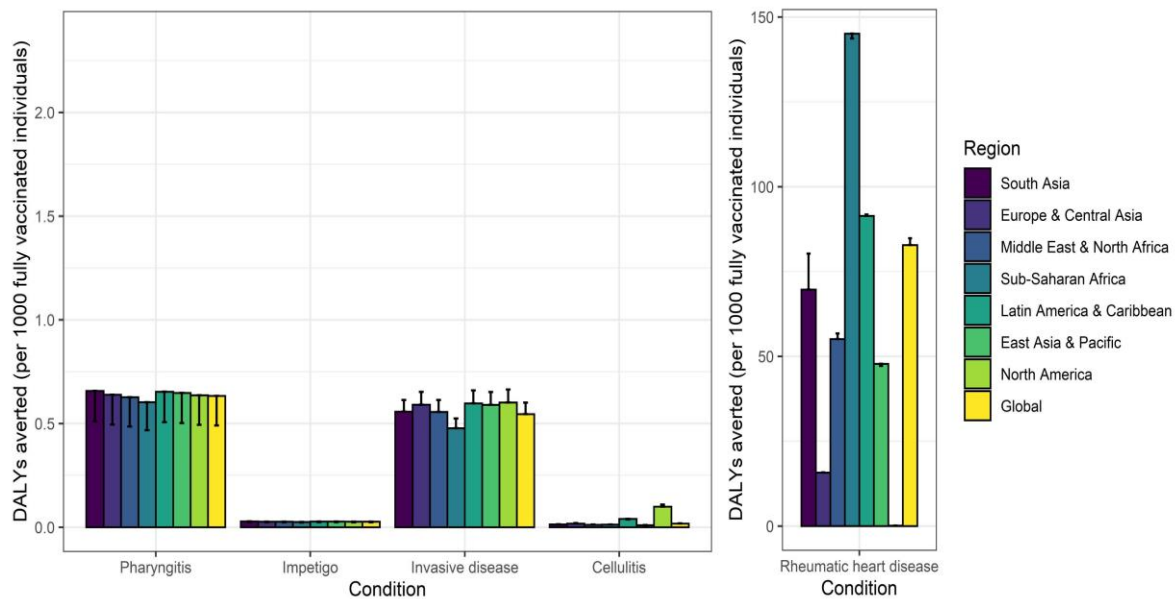

**Supplementary Figure 4. Vaccine impact (deaths averted per 1,000 fully vaccinated individuals) at the regional and global levels.** The vaccine impact on deaths averted per 1,000 fully vaccinated individuals is stratified at the regional (United Nations regions) and global levels for different scenarios (estimate for scenario 1 and range across the six scenarios), based on the lifetime health impact of vaccination at birth or 5 years of age for 30 vaccinated cohorts on Strep A disease burden that results in death (invasive disease and rheumatic heart disease). The vertical bars show the estimates for scenarios 1, 3, and 5 (which are equal), and the error bars show the estimates for scenarios 2, 4, and 6 (which are equal).

**Vaccination at birth**

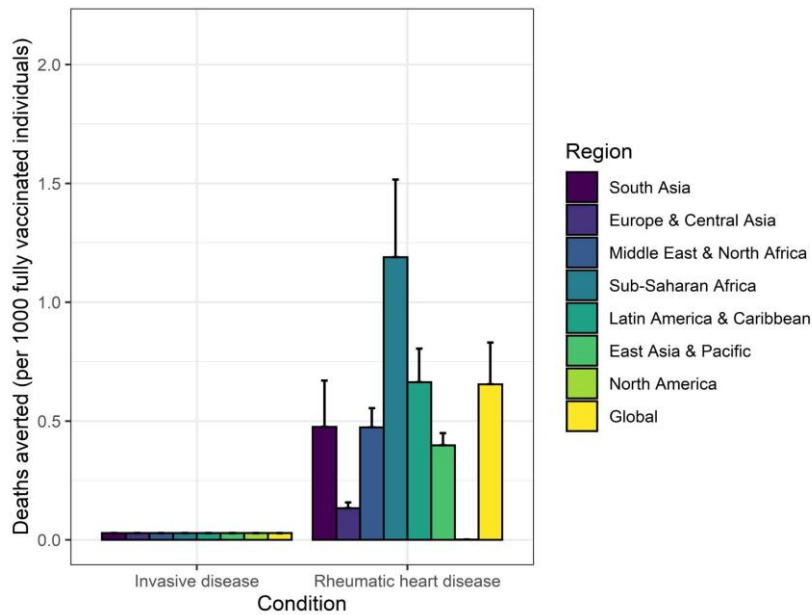

**Vaccination at 5 years of age**

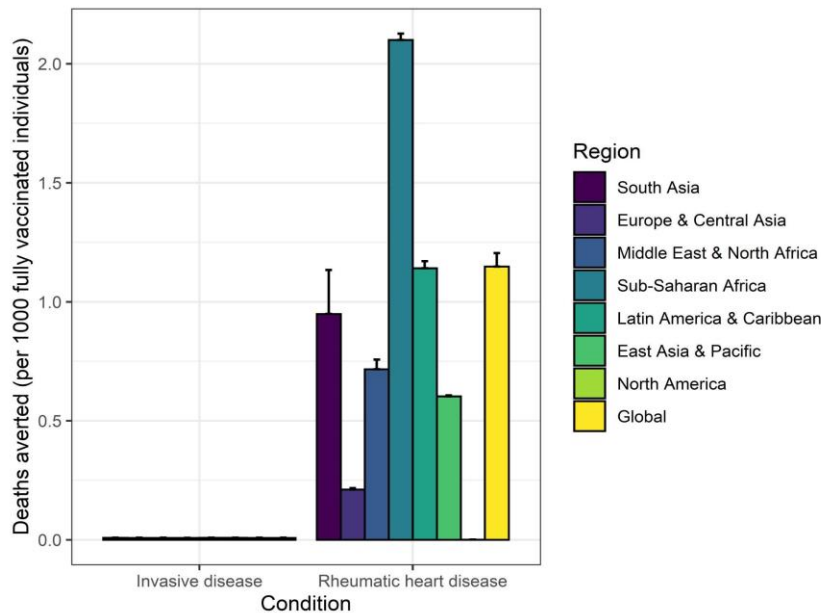

**Supplementary Figure 5. Vaccine impact (cases averted per 1,000 fully vaccinated individuals) at the national level.** The vaccine impact on cases averted per 1,000 fully vaccinated individuals is shown for 183 countries, based on the lifetime health impact of vaccination at birth or 5 years of age for 30 vaccinated cohorts on Strep A disease burden (pharyngitis, impetigo, invasive disease, cellulitis, and rheumatic heart disease) for scenario 1.

**Vaccination at birth**

Cases averted per 1000 fully vaccinated individuals

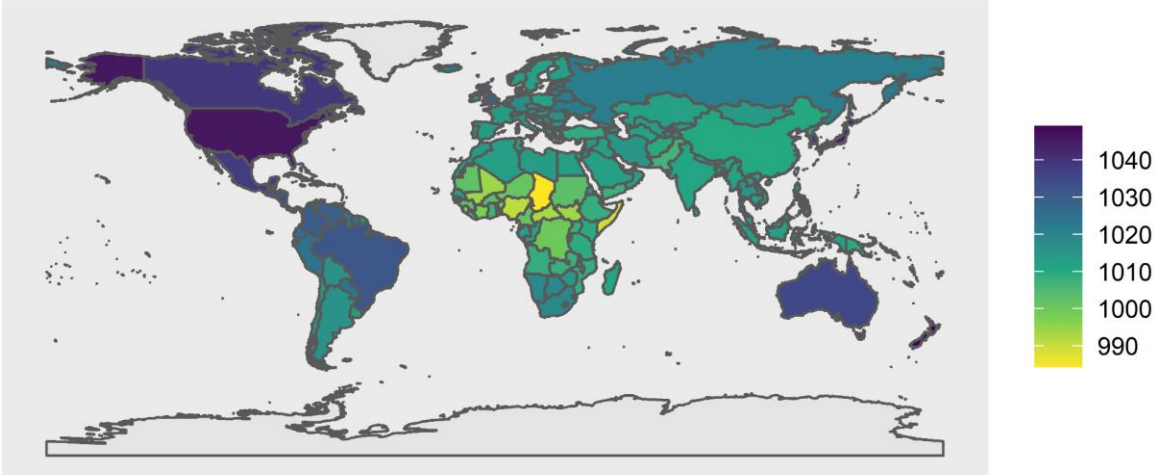

**Vaccination at 5 years of age**

Cases averted per 1000 fully vaccinated individuals

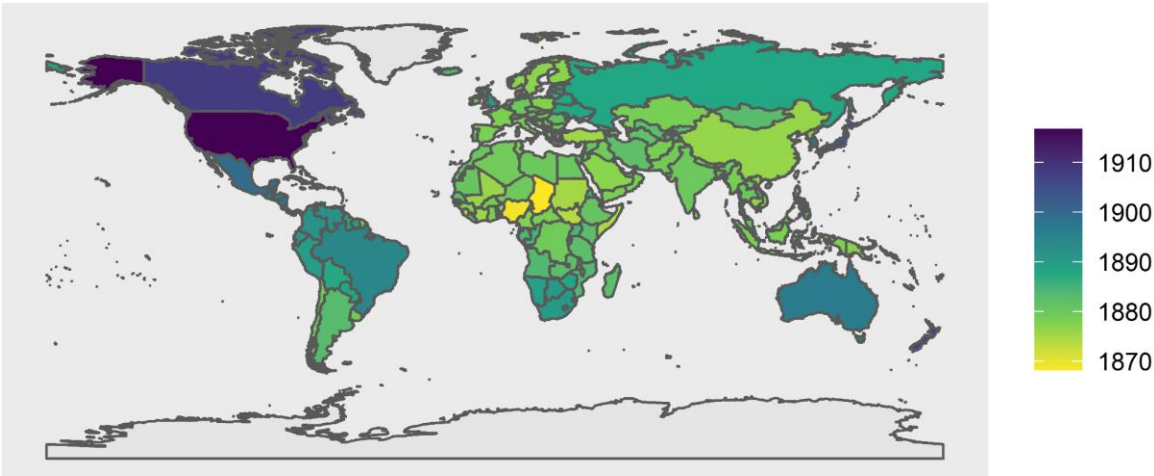

**Supplementary Figure 6. Vaccine impact (deaths averted per 1,000 fully vaccinated individuals) at the national level.** The vaccine impact on deaths averted per 1,000 fully vaccinated individuals is shown for 183 countries, based on the lifetime health impact of vaccination at birth or 5 years of age for 30 vaccinated cohorts on Strep A disease burden resulting in death (invasive disease and rheumatic heart disease) for scenario 1.

### Vaccination at birth

Deaths averted per 1000 fully vaccinated individuals

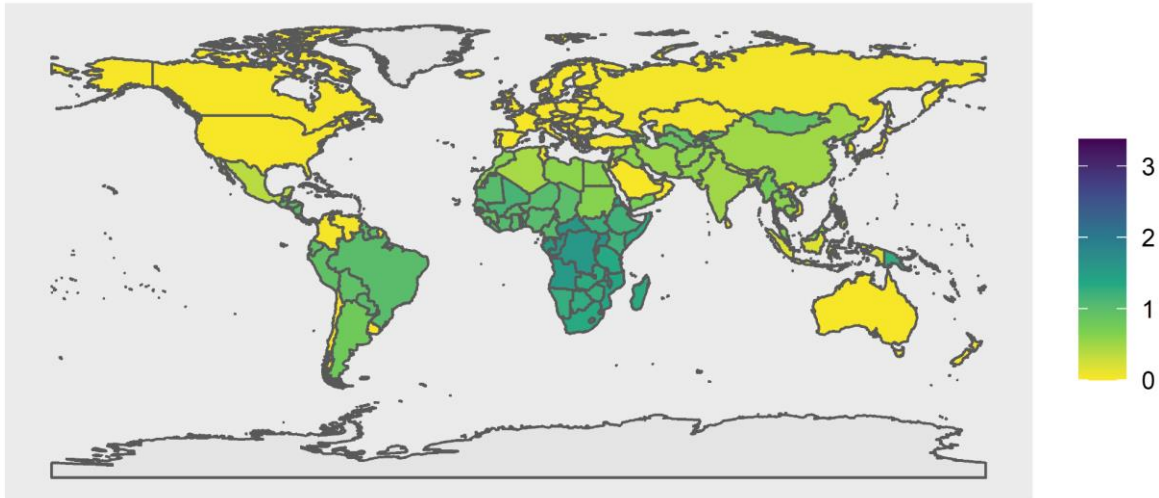

### Vaccination at 5 years of age

Deaths averted per 1000 fully vaccinated individuals

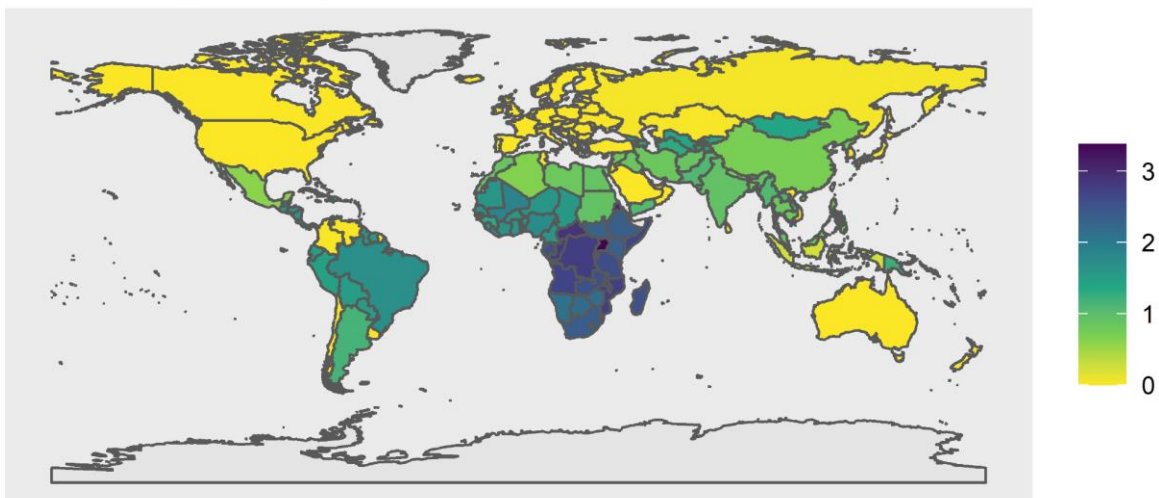

Supplement: 41541_2023_668_MOESM1_ESM.pdf [file 41541_2023_668_MOESM1_ESM.pdf]
